# Supplementary material for: Boosted mechanosensitivity of stretchable conductive composite strain sensors based on kirigami cut design
Source: Royal Society of Chemistry journal article supplement (doi:10.1039/d3tc01751f), 2023-01-01
Supplement: d3tc01751f1.pdf [file d3tc01751f1.pdf]

## Supplementary Information

### **Boosted mechanosensitivity of stretchable conductive composite strain sensors based on kirigami cut design**

Sung-Hun Ha <sup>a</sup> and Jong-Man Kim <sup>\*a,b</sup>

<sup>a</sup> Department of Nano Fusion Technology, Pusan National University, Busan 46214, Republic of Korea.

<sup>b</sup> Department of Nanoenergy Engineering and Research Center for Energy Convergence Technology, Pusan National University, Busan 46214, Republic of Korea.

\*Corresponding author: [jongkim@pusan.ac.kr](mailto:jongkim@pusan.ac.kr)

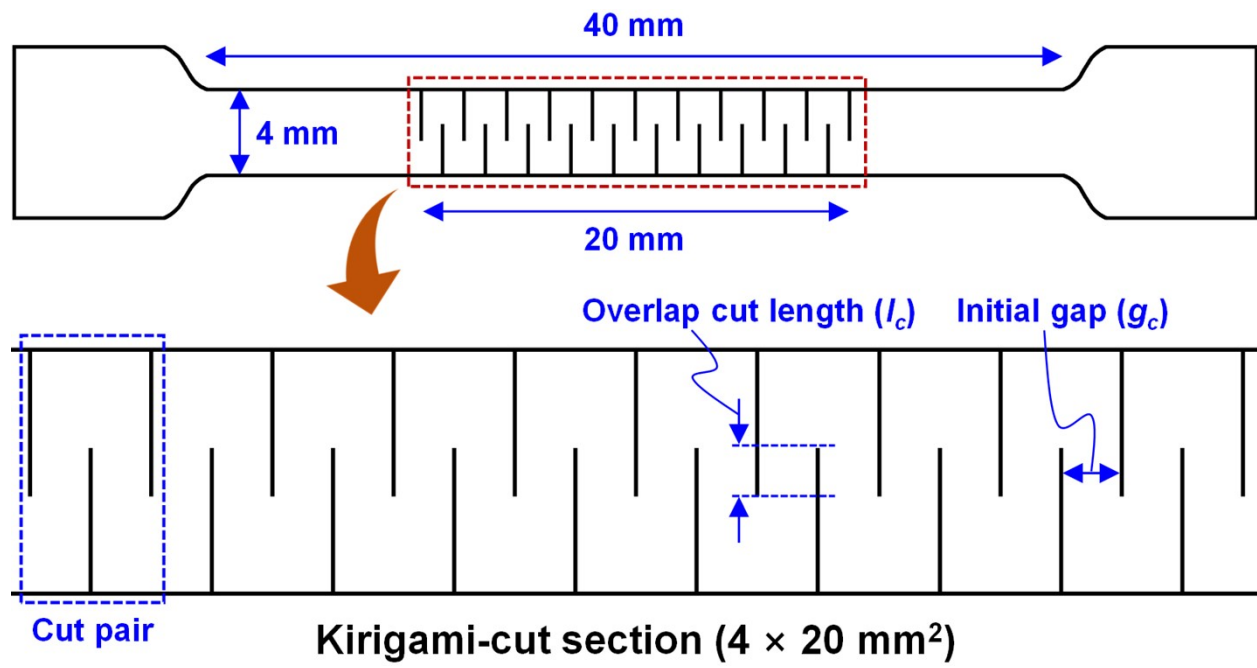

Fig. S1 Detailed layout of the kirigami-cut section in the designed CUT strain sensor.

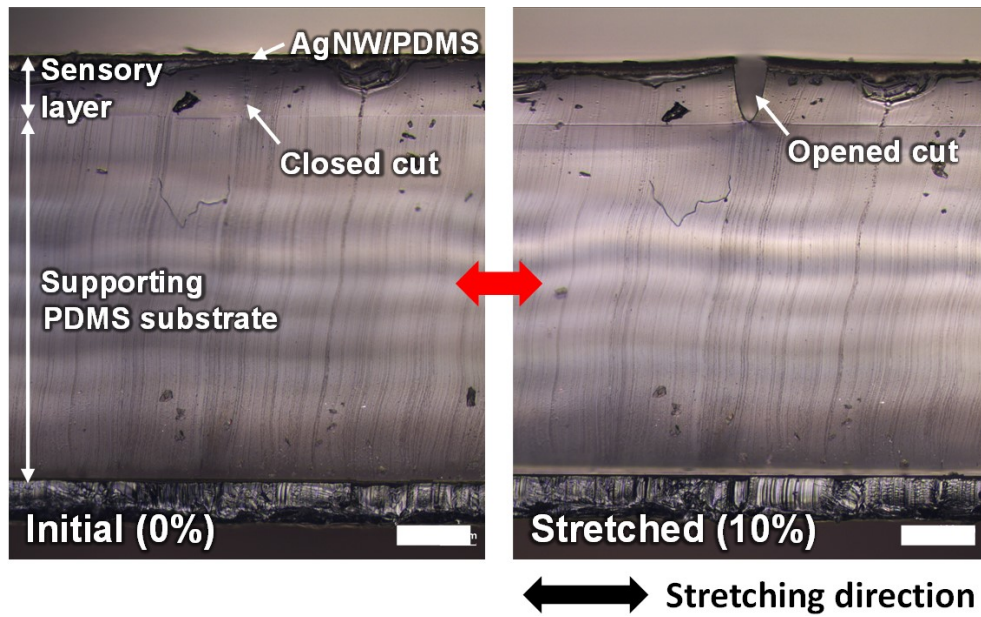

Fig. S2 Cross-sectional microscope images of the CUT-10 sensor in the initial and 10%-stretched states (scale bars: 200  $\mu\text{m}$ ).

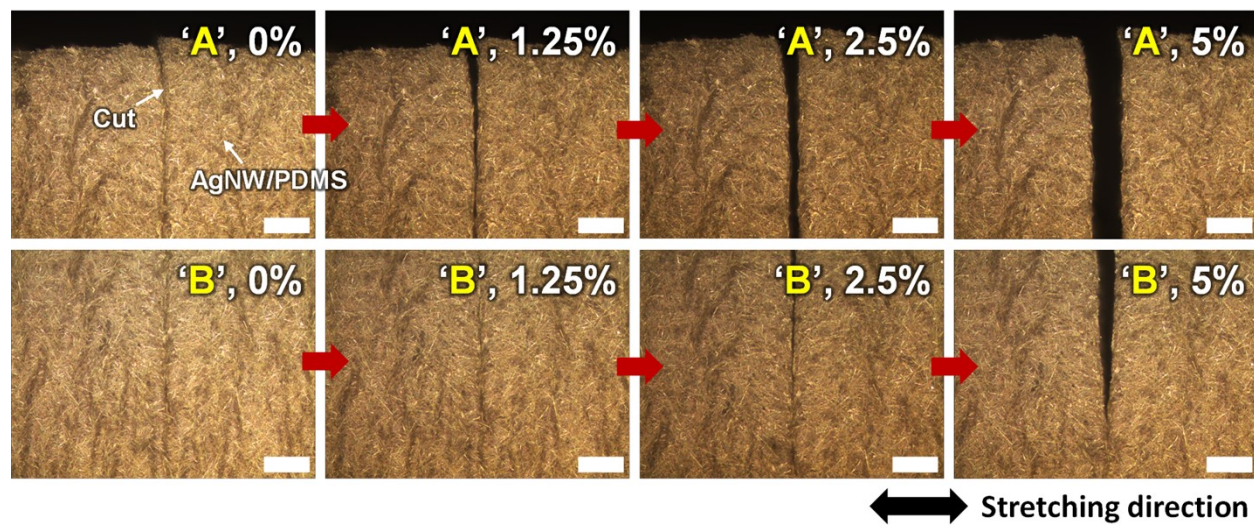

Fig. S3 Sequential microscope images showing the detailed strain-dependent opening process of mechanical cuts of the CUT strain sensor (CUT-10 model) in the first stretching phase (scale bars: 200  $\mu\text{m}$ ).

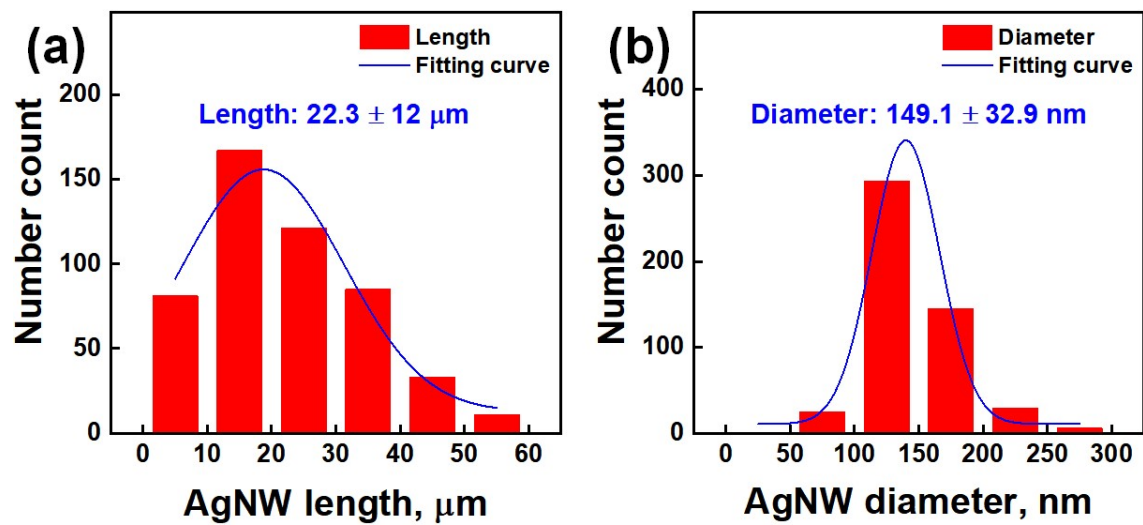

Fig. S4 (a) Length and (b) diameter distributions of the synthesized AgNWs.

In addition to strain sensor applications, various functional silver nanostructures such as nanowires,<sup>51–53</sup> nanoparticles,<sup>54–57</sup> and nanosheets<sup>58</sup> have been widely used for various purposes in diverse fields: electromagnetic interference shielding devices,<sup>51,52</sup> electrocardiogram electrodes,<sup>53</sup> antimicrobial applications,<sup>54–57</sup> and piezoresistive pressure sensors.<sup>58</sup>

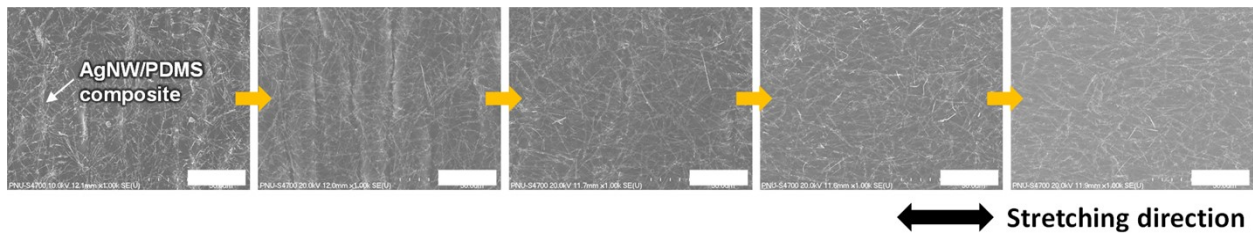

Fig. S5 Sequential SEM images showing the strain-dependent morphological evolution of the AgNW network of the reference composite sensor without a kirigami cut design (scale bars: 30  $\mu\text{m}$ ).

The top-view SEM images in Fig. S5 show the AgNW/PDMS composite after being subjected to some pre-stretching cycles. The buckles on the surface of the AgNW/PDMS composite might be induced in the process of releasing strains caused by mechanical instability of the bilayer composite substrate comprising two layers with different mechanical stiffness (i.e., AgNW/PDMS composite layer and pure PDMS layer).<sup>S9–S11</sup>

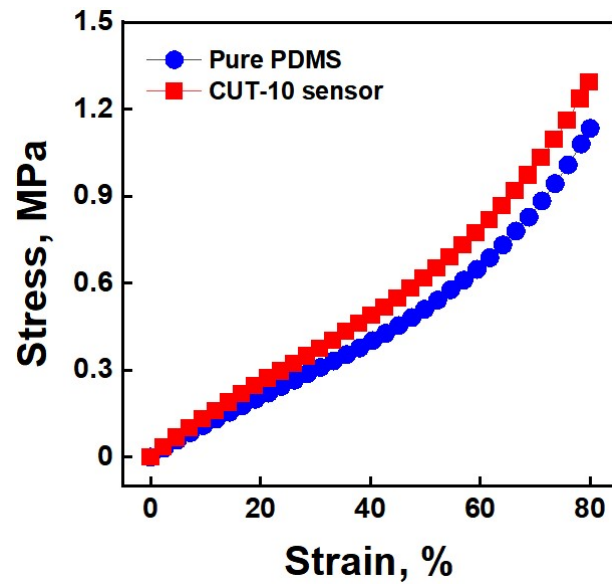

Fig. S6 Stress-strain curves of the CUT-10 strain sensor and pure PDMS sheet.

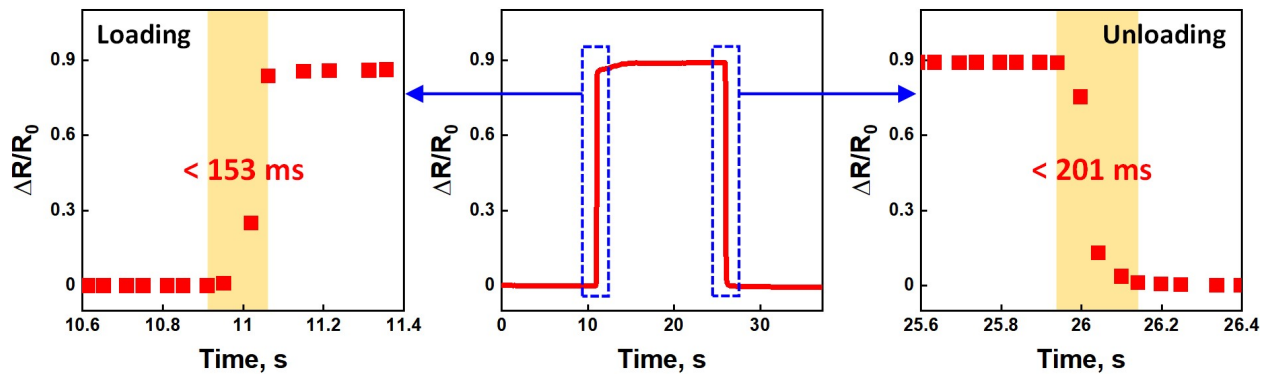

Fig. S7 Time response of the CUT-10 strain sensor when loading and unloading 3% strain at a speed of 600 mm/min.



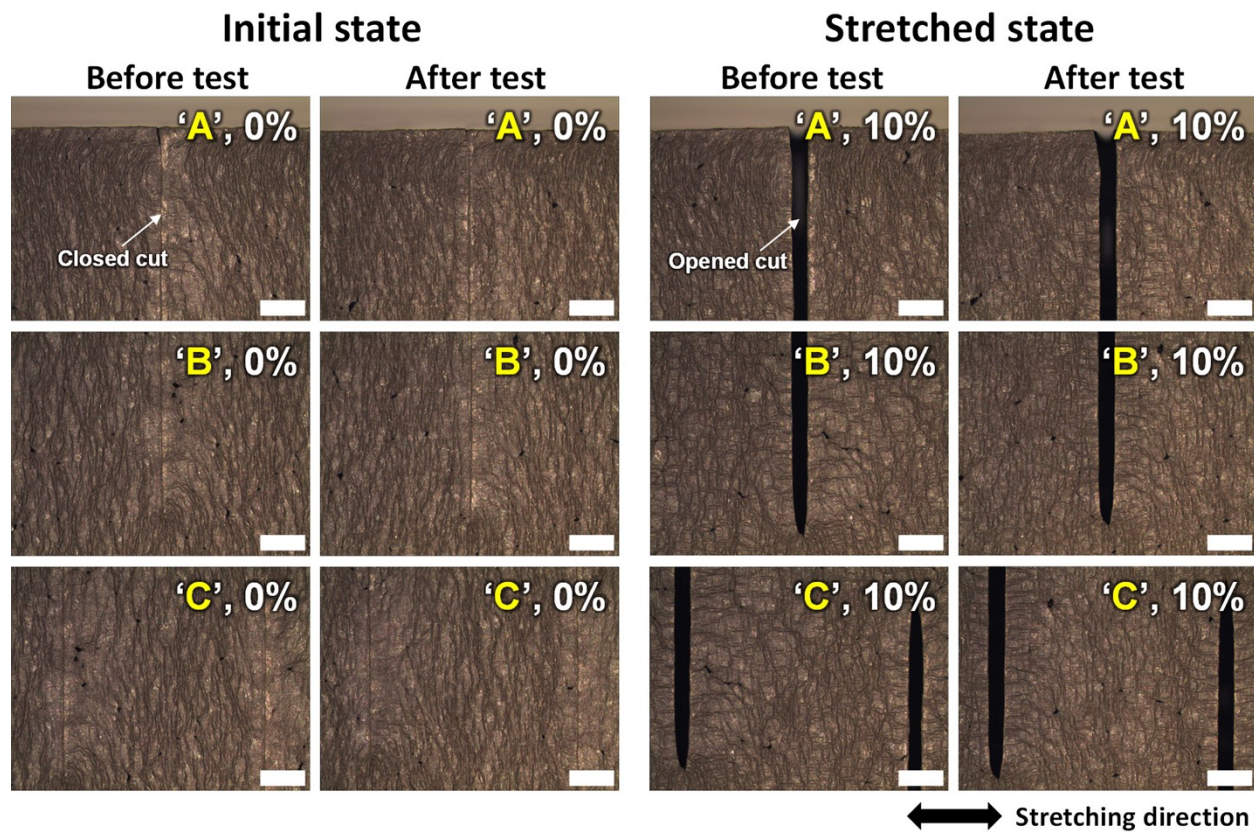

Fig. S8 Top-view microscope images of the CUT-10 strain sensor (a) before and (b) after 1000 stretching cycles at 80% strain (scale bars: 200  $\mu\text{m}$ ).

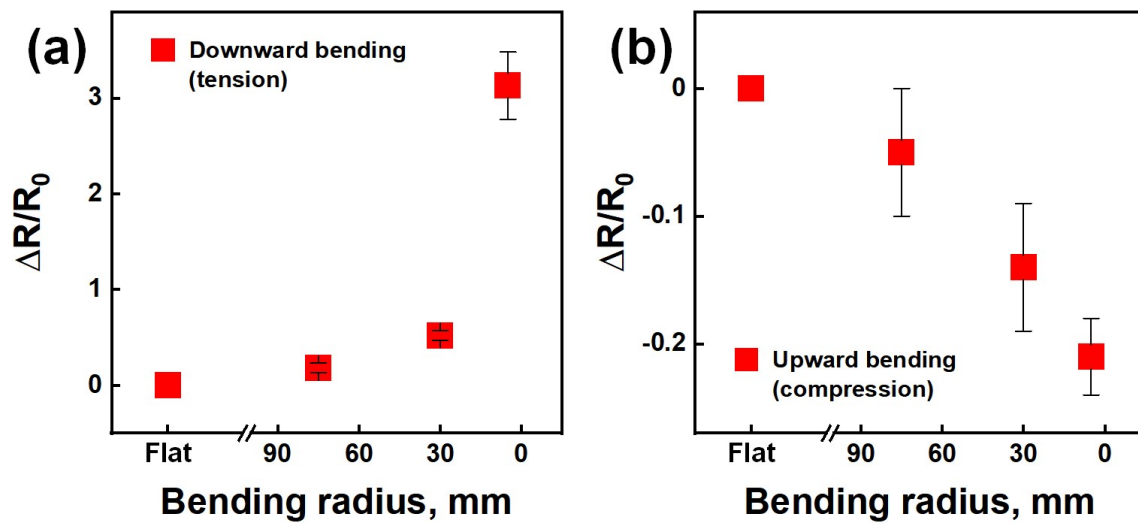

Fig. S9 Relative change in resistance ( $\Delta R/R_0$ ) of the CUT-10 strain sensor under (a) outward and (b) inward bending deformations at various bending radii.

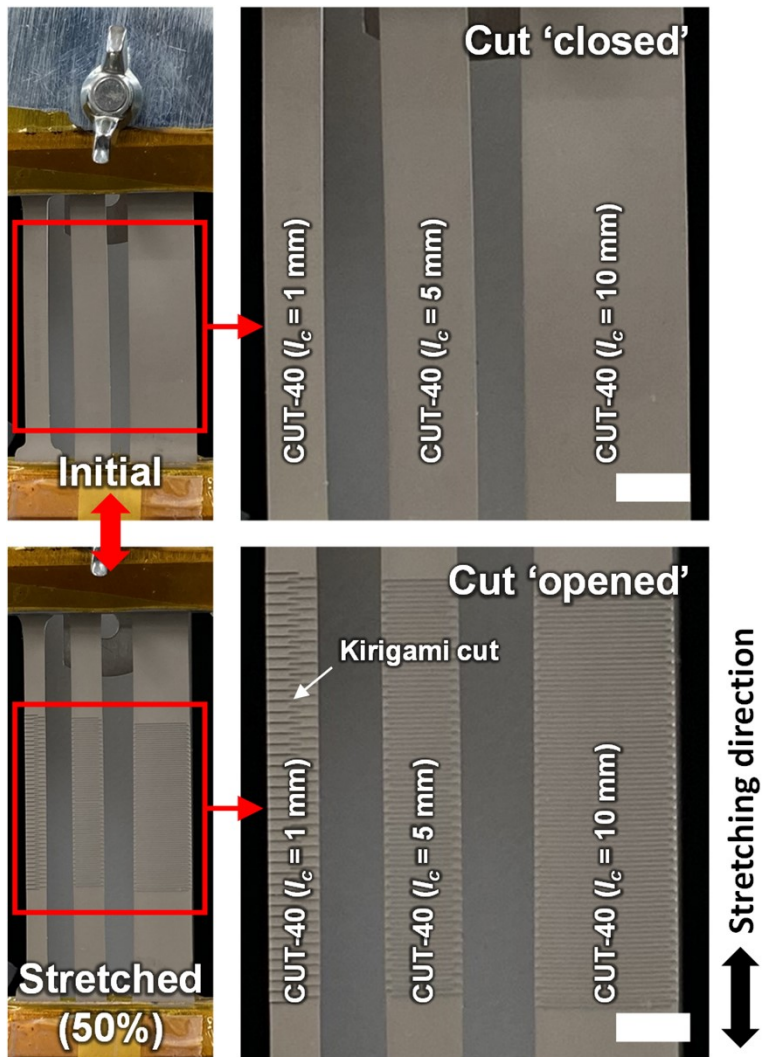

Fig. S10 Digital photographs of the CUT-40 strain sensors with different overlap cut lengths ( $l_c = 1, 5, \text{ and } 10$  mm) in the initial and 50%-stretched states (scale bars: 5 mm).

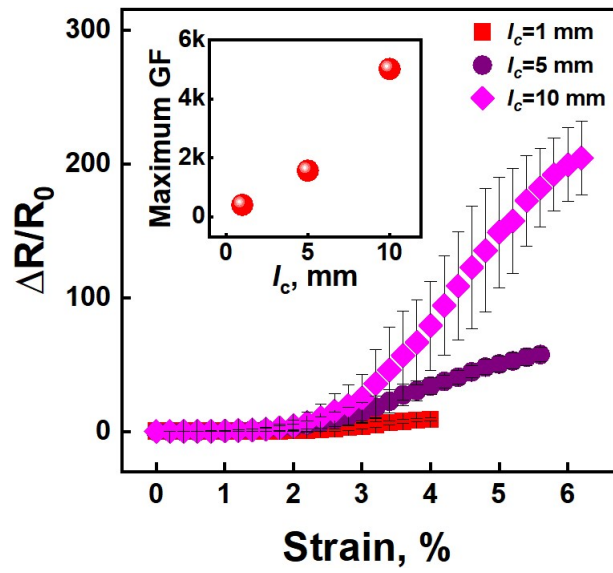

Fig. S11  $\Delta R/R_0$  curves for the first stretching phase of the CUT-40 strain sensors with different overlap cut lengths ( $l_c = 1, 5, \text{ and } 10$  mm) (inset: maximum gauge factors (GFs) of the devices in the first stretching phase.).

Table S1 Quantitative sensor responses of each CUT strain sensor model in the first stretching phase.

|        | $\epsilon$ (%) | GF    | R <sup>2</sup> |
|--------|----------------|-------|----------------|
| CUT-10 | 0–0.6          | 2.8   | 0.955          |
|        | 0.6–1.2        | 13.3  | 0.951          |
|        | 1.2–3          | 63.1  | 0.992          |
| CUT-20 | 0–0.6          | 4.3   | 0.938          |
|        | 0.6–1.2        | 24.1  | 0.953          |
|        | 1.2–3.8        | 134.5 | 0.994          |
| CUT-30 | 0–0.6          | 3.5   | 0.946          |
|        | 0.6–1.2        | 17    | 0.955          |
|        | 1.2–3.8        | 280.5 | 0.983          |
| CUT-40 | 0–0.6          | 2.3   | 0.981          |
|        | 0.6–1.6        | 18.6  | 0.903          |
|        | 1.6–4          | 400.2 | 0.958          |

Table S2 Quantitative sensor responses of the CUT-40 strain sensors with different cut lengths ( $l_c$ ) in the first stretching phase.

|                       | $\varepsilon$ (%) | GF     | $R^2$ |
|-----------------------|-------------------|--------|-------|
| $l_c = 1 \text{ mm}$  | 0–0.6             | 2.3    | 0.981 |
|                       | 0.6–1.6           | 18.6   | 0.903 |
|                       | 1.6–4             | 400.2  | 0.958 |
| $l_c = 5 \text{ mm}$  | 0–0.6             | 13.7   | 0.901 |
|                       | 0.6–1.6           | 141.5  | 0.926 |
|                       | 1.6–5.6           | 1562   | 0.987 |
| $l_c = 10 \text{ mm}$ | 0–0.6             | 18.7   | 0.926 |
|                       | 0.6–1.6           | 160.2  | 0.923 |
|                       | 1.6–6.2           | 5013.1 | 0.969 |

Table S3 Comparison of sensitivity enhancement techniques for CEC-based strain sensors.

| Strategy                              | Stretchability | Sensitivity (GF @ strain)                    | Ref.                       |
|---------------------------------------|----------------|----------------------------------------------|----------------------------|
| Density control of fillers            | 500%           | 7 @ 50%                                      | Chen et al. (2016) [13]    |
|                                       | 43%            | 22 @ 0–15%                                   | Kumar et al. (2019) [14]   |
|                                       | 106%           | 6.5 @ 0–15%                                  |                            |
|                                       | 217%           | 2.0 @ 0–15%                                  |                            |
|                                       | 30%            | 47 @ < 30%                                   | Arif et al. (2018) [15]    |
| 90%                                   | 19 @ < 90%     |                                              |                            |
| 110%                                  | 8 @ < 110%     |                                              |                            |
|                                       | 80%            | 2.2 @ 0–40%                                  | Ren et al. (2017) [25]     |
| Hybridization of fillers              | 300%           | 0.91 @ 0–100%                                | Zheng et al. (2018) [17]   |
|                                       | 50%            | 35 @ 0–20%                                   | Kumar et al. (2022) [18]   |
|                                       | 100%           | 6.3 @ 0–40%                                  | Zhou et al. (2020) [20]    |
|                                       | 70%            | 5.96 @ 0–3%                                  | Lan et al. (2019) [26]     |
|                                       | 60%            | 10 @ 0–15%                                   | Nankali et al. (2020) [27] |
| Structural modification of composites | 400%           | 740 @ 0–150%                                 | Yang et al. (2023) [31]    |
|                                       | 210%           | 20 @ 0–50%                                   | Zhang et al. (2022) [33]   |
|                                       | 25%            | 1.1 @ 0–18%                                  | Li et al. (2017) [34]      |
|                                       | 800%           | 5.8 @ 0–200%                                 | Zhou et al. (2019) [35]    |
|                                       | 150%           | 24.6 @ 0–130%                                | Kim et al. (2018) [36]     |
|                                       | 55%            | 84.1 @ 0–6%                                  | Zhang et al. (2022) [37]   |
| Structural modification of substrates | 68%            | 4.5 @ 0–25%                                  | Ha et al. (2022) [38]      |
|                                       | 50%            | 926 @ 9.6%                                   | Heo et al. (2017) [39]     |
| Kirigami cut design                   | 80%            | 63.1 @ 1.2–3% ( $N_c = 10, l_c = 1$ mm)      | This work                  |
|                                       | 80%            | 400.2 @ 1.6–4% ( $N_c = 40, l_c = 1$ mm)     |                            |
|                                       | 80%            | 5013.1 @ 1.6–6.2% ( $N_c = 40, l_c = 10$ mm) |                            |

## References

- S1 K. Liu, W. Liu, Y. Duan, K. Zhou, S. Zhang, S. Ni, T. Xu, H. Du, and C. Si, *Adv. Compos. Hybrid Mater.*, 2022, **5**, 1078.
- S2 H. Cheng, Y. Pan, Q. Chen, R. Che, G. Zheng, C. Liu, C. Shen, and X. Liu, *Adv. Compos. Hybrid Mater.*, 2021, **4**, 505.
- S3 K. Huang, J. Liu, S. Lin, Y. Wu, E. Chen, Z. He, and M. Lei, *Adv. Compos. Hybrid Mater.*, 2022, **5**, 220.
- S4 S. K. Kale, G. V. Parishwad, A. S. N. Husainy, and A. S. Patil, *ES Food Agrofor.*, 2021, **3**, 17.
- S5 O. M. Atta, S. Manan, M. Ul-Islam, A. A. Q. Ahmed, M. W. Ullah, and G. Yang, *ES Food Agrofor.*, 2021, **6**, 12.
- S6 S. R. Prasad, S. B. Teli, J. Ghosh, N. R. Prasad, V. S. Shaikh, G. M. Nazeruddin, A. G. Al-Sehemi, I. Patel, and Y. I. Shaikh, *Eng. Sci.*, 2021, **16**, 90.
- S7 T. Wang, Wusigale, D. Kuttappan, M. A. Amalaradjou, Y. Luo, and Y. Luo, *Adv. Compos. Hybrid Mater.*, 2022, **4**, 696.
- S8 J. Liu, E. Chen, Y. Wu, H. Yang, K. Huang, G. Chang, X. Pan, K. Huang, Z. He, and M. Lei, *Adv. Compos. Hybrid Mater.*, 2022, **5**, 1196.
- S9 J. -Y. Noh, S. -H. Ha, G. R. Jeon, and J. -M. Kim, *Compos. Sci. Technol.*, 2022, **230**, 109738.
- S10 M. Amjadi, A. Pichitpajongkit, S. Lee, S. Ryu, and I. Park, *ACS Nano*, 2014, **8**, 5154.
- S11 F. Xu and Y. Zhu, *Adv. Mater.*, 2012, **24**, 5117.
